# Supplementary material for: Experimental and theoretical study of phosphinine sulfides
Source: Royal Society of Chemistry journal article supplement (doi:10.1039/b702851b), 2007-01-01

## Experimental and Theoretical Study of Phosphinine Sulfides

Audrey Moores, Thibault Cantat, Nicolas Mézailles, Louis Ricard and Pascal le Floch\*.  
*Laboratoire « Hétéroéléments et Coordination », UMR CNRS 7653, Ecole Polytechnique,  
91128 Palaiseau cedex, France.*

### X-Ray structural data for 3

|                                                          |        |
|----------------------------------------------------------|--------|
| Table 1: Crystal data of compound 3                      | 1 page |
| Figure S1 : Ortep view of crystal structure of complex 3 | 1 page |

### X-Ray structural data for 4

|                                                          |        |
|----------------------------------------------------------|--------|
| Table 2: Crystal data of compound 4                      | 1 page |
| Figure S2 : Ortep view of crystal structure of complex 4 | 1 page |

### X-Ray structural data for 2

|                                                          |        |
|----------------------------------------------------------|--------|
| Table 3: Crystal data of compound 2                      | 1 page |
| Figure S3 : Ortep view of crystal structure of complex 2 | 1 page |

### Listing of coordinates for calculated structures

|                                                                                        |        |
|----------------------------------------------------------------------------------------|--------|
| Table 4: Optimized structure and three lower frequencies for <b>III</b>                | 1 page |
| Table 5 : Optimized structure and three lower frequencies for <b>IV</b>                | 1 page |
| Table 6 : Optimized structure and three lower frequencies for <b>V</b>                 | 1 page |
| Table 7 : Optimized structure and three lower frequencies for <b>barrelene sulfide</b> | 1 page |
| Table 8 : Optimized structure and three lower frequencies for <b>Diels Alder TS</b>    | 1 page |
| Table 9 : Optimized structure and three lower frequencies for <b>acetylene</b>         | 1 page |

Table 1. Crystal data for **3**

|                                             |                                     |
|---------------------------------------------|-------------------------------------|
| Molecular formula                           | C <sub>29</sub> H <sub>21</sub> PS  |
| Molecular weight                            | 432.49                              |
| Crystal habit                               | pale yellow block                   |
| Crystal dimensions(mm)                      | 0.22x0.16x0.16                      |
| Crystal system                              | monoclinic                          |
| Space group                                 | P2 <sub>1</sub> /n                  |
| a(Å)                                        | 10.371(1)                           |
| b(Å)                                        | 12.926(1)                           |
| c(Å)                                        | 17.070(1)                           |
| α(°)                                        | 90.00                               |
| β(°)                                        | 94.20                               |
| γ(°)                                        | 90.00                               |
| V(Å <sup>3</sup> )                          | 2282.2(3)                           |
| Z                                           | 4                                   |
| d(g·cm <sup>-3</sup> )                      | 1.259                               |
| F000                                        | 904                                 |
| μ(cm <sup>-1</sup> )                        | 0.226                               |
| Absorption corrections                      | multi-scan ; 0.9520 min, 0.9648 max |
| Diffractometer                              | KappaCCD                            |
| X-ray source                                | MoKα                                |
| λ(Å)                                        | 0.71069                             |
| Monochromator                               | graphite                            |
| T (K)                                       | 293.0(10)                           |
| Scan mode                                   | phi and omega scans                 |
| Maximum θ                                   | 25.68                               |
| HKL ranges                                  | -12 9 ; -14 15 ; -17 20             |
| Reflections measured                        | 10757                               |
| Unique data                                 | 4303                                |
| Rint                                        | 0.0763                              |
| Reflections used                            | 2928                                |
| Criterion                                   | >2σ(I)                              |
| Refinement type                             | Fsqd                                |
| Hydrogen atoms                              | mixed                               |
| Parameters refined                          | 280                                 |
| Reflections / parameter                     | 10                                  |
| wR2                                         | 0.1629                              |
| R1                                          | 0.0565                              |
| Weights a, b                                | 0.0978 ; 0.0000                     |
| GoF                                         | 1.018                               |
| difference peak / hole (e Å <sup>-3</sup> ) | 0.345(0.063) / -0.422(0.063)        |

Figure S1 : Ortep view of crystal structure of complex **3**. Ellipsoids are scaled to enclose 50% of the electron density.

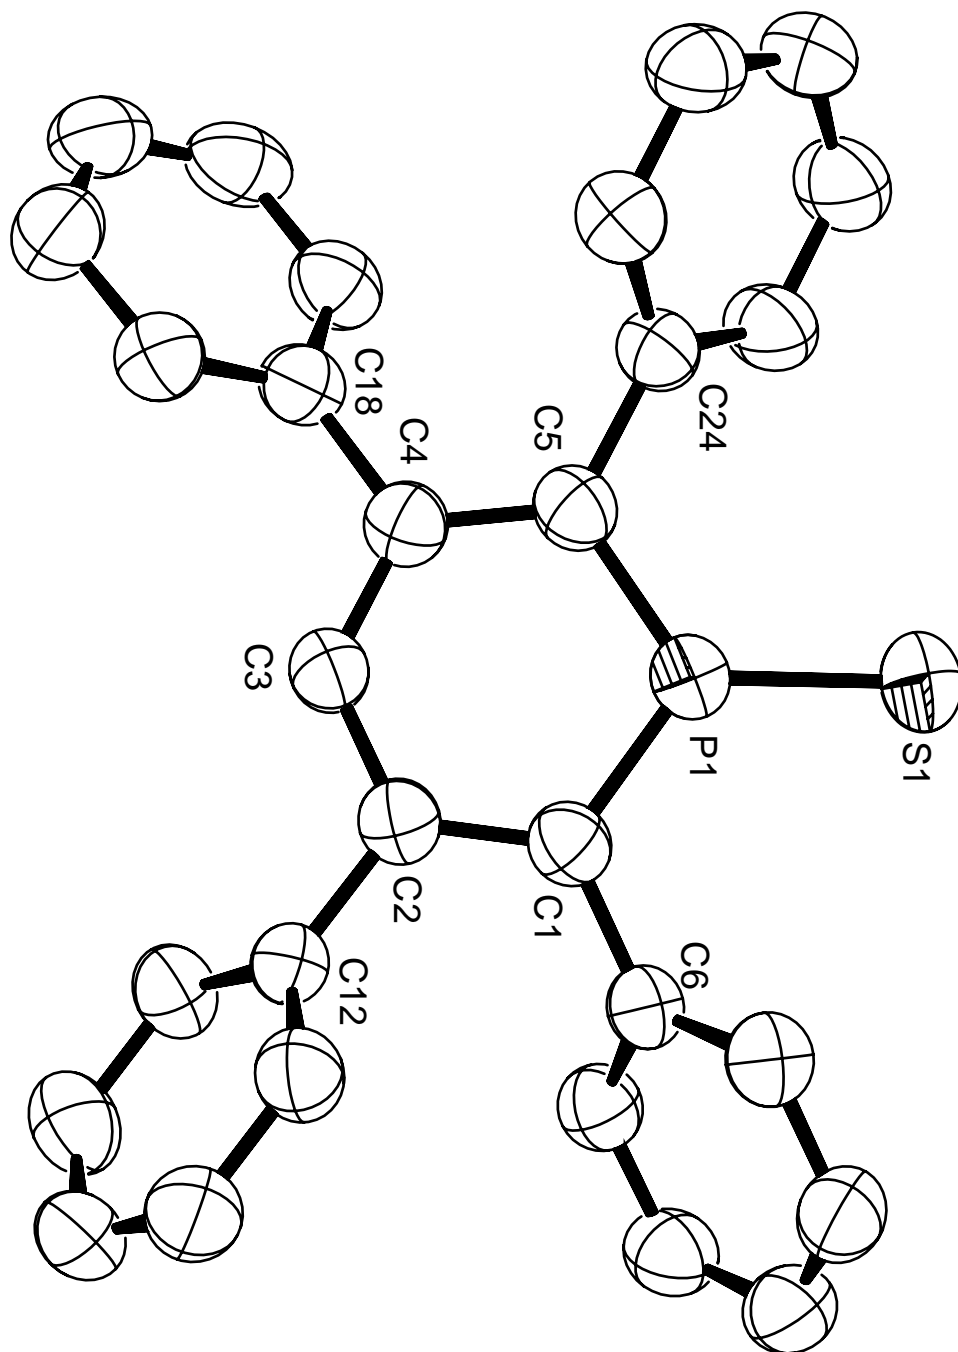

Table 2. Crystal data for **4**

|                                             |                                                   |
|---------------------------------------------|---------------------------------------------------|
| Compound                                    | <b>4</b>                                          |
| Molecular formula                           | C <sub>23</sub> H <sub>29</sub> PSSi <sub>2</sub> |
| Molecular weight                            | 424.68                                            |
| Crystal habit                               | pale yellow needle                                |
| Crystal dimensions(mm)                      | 0.20x0.12x0.10                                    |
| Crystal system                              | orthorhombic                                      |
| Space group                                 | Pbcn                                              |
| a(Å)                                        | 17.932(1)                                         |
| b(Å)                                        | 12.292(1)                                         |
| c(Å)                                        | 20.981(1)                                         |
| α(°)                                        | 90.00                                             |
| β(°)                                        | 90.00                                             |
| γ(°)                                        | 90.00                                             |
| V(Å <sup>3</sup> )                          | 4624.6(5)                                         |
| Z                                           | 8                                                 |
| d(g·cm <sup>-3</sup> )                      | 1.220                                             |
| F(000)                                      | 1808                                              |
| μ(cm <sup>-1</sup> )                        | 0.319                                             |
| Absorption corrections                      | multi-scan ; 0.9389 min, 0.9688 max               |
| Diffractometer                              | KappaCCD                                          |
| X-ray source                                | MoKα                                              |
| λ(Å)                                        | 0.71069                                           |
| Monochromator                               | graphite                                          |
| T (K)                                       | 150.0(1)                                          |
| Scan mode                                   | phi and omega scans                               |
| Maximum θ                                   | 27.45                                             |
| HKL ranges                                  | -23 21 ; -15 15 ; -27 27                          |
| Reflections measured                        | 19073                                             |
| Unique data                                 | 5271                                              |
| Rint                                        | 0.0267                                            |
| Reflections used                            | 4326                                              |
| Criterion                                   | I > 2σ(I)                                         |
| Refinement type                             | Fsqd                                              |
| Hydrogen atoms                              | mixed                                             |
| Parameters refined                          | 279                                               |
| Reflections / parameter                     | 15                                                |
| wR2                                         | 0.0998                                            |
| R1                                          | 0.0332                                            |
| Weights a, b                                | 0.0598 ; 0.9132                                   |
| GoF                                         | 1.045                                             |
| difference peak / hole (e Å <sup>-3</sup> ) | 0.274(0.048) / -0.340(0.048)                      |

# Supplementary Material (ESI) for New Journal of Chemistry  
# This journal is (c) The Royal Society of Chemistry and  
# The Centre National de la Recherche Scientifique, 2007

Figure S2 : Ortep view of crystal structure of complex **4**. Ellipsoids are scaled to enclose 50% of the electron density.

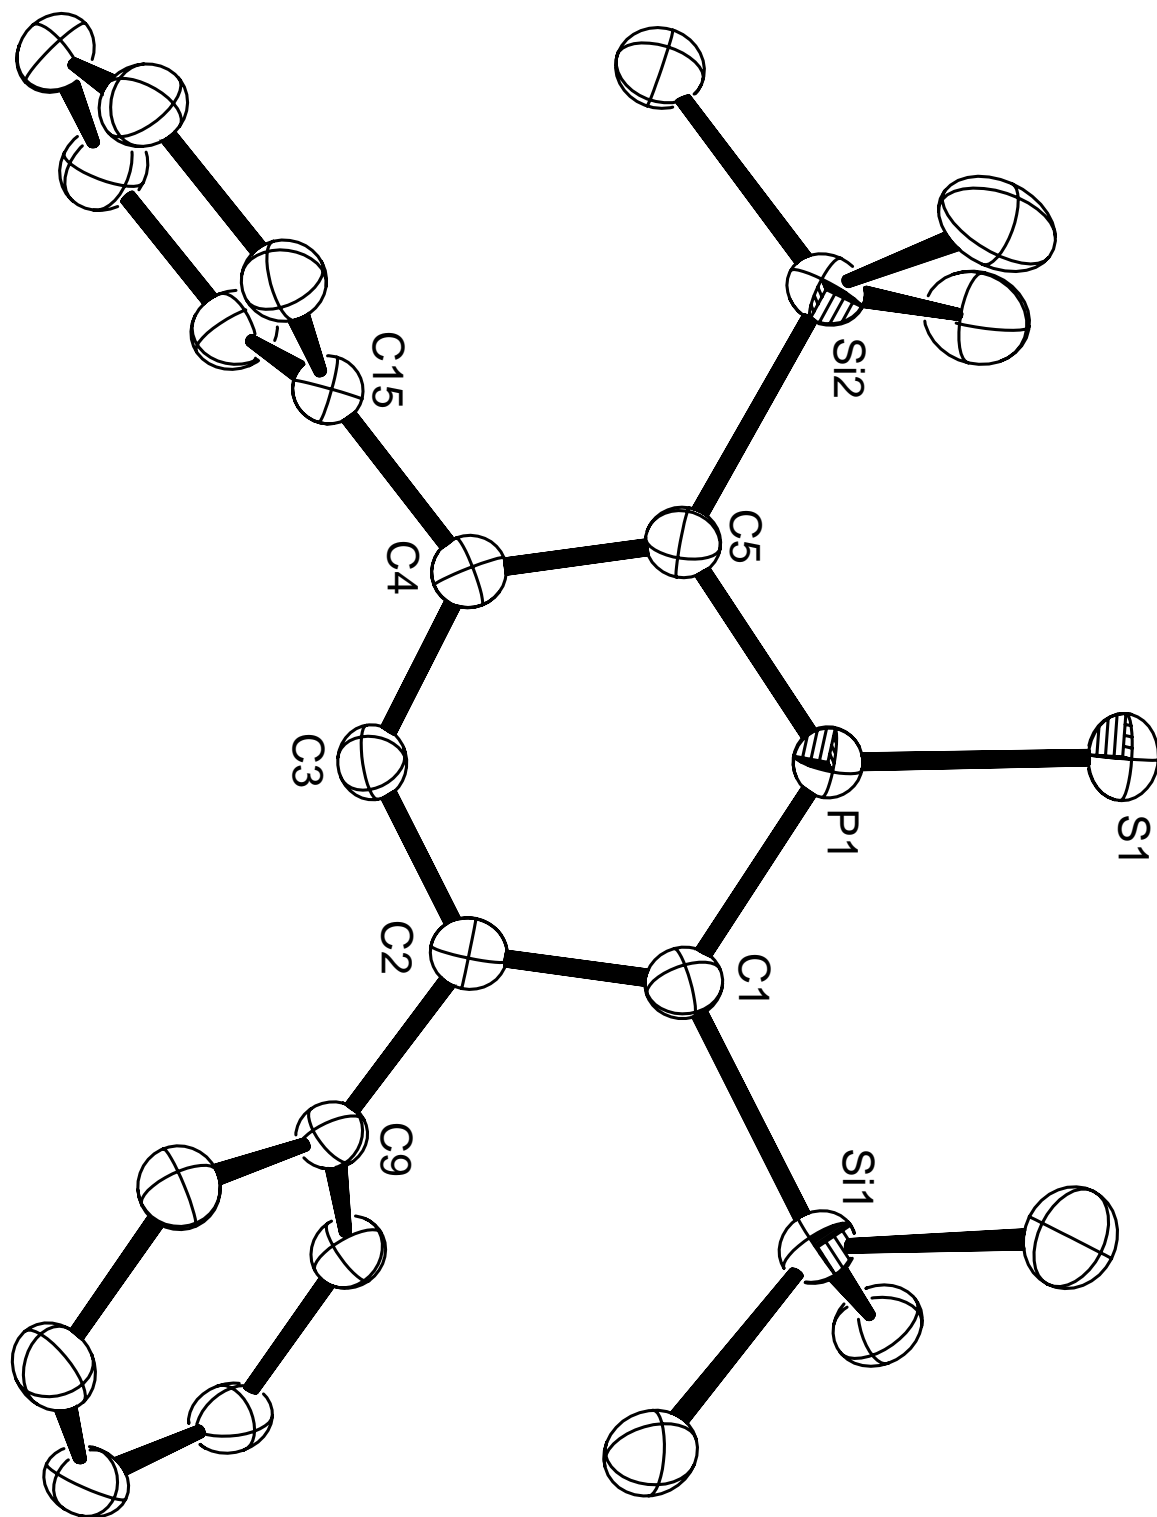

Table 3. Crystal data for **2**

|                                             |                                                  |
|---------------------------------------------|--------------------------------------------------|
| Compound                                    | psi2ph2                                          |
| Molecular formula                           | C <sub>23</sub> H <sub>29</sub> PSi <sub>2</sub> |
| Molecular weight                            | 392.61                                           |
| Crystal habit                               | colorless block                                  |
| Crystal dimensions(mm)                      | 0.20x0.20x0.16                                   |
| Crystal system                              | monoclinic                                       |
| Space group                                 | P2 <sub>1</sub> /n                               |
| a(Å)                                        | 12.081(1)                                        |
| b(Å)                                        | 17.513(1)                                        |
| c(Å)                                        | 12.328(1)                                        |
| α(°)                                        | 90.00                                            |
| β(°)                                        | 118.0220(10)                                     |
| γ(°)                                        | 90.00                                            |
| V(Å <sup>3</sup> )                          | 2302.5(3)                                        |
| Z                                           | 4                                                |
| d(g·cm <sup>-3</sup> )                      | 1.133                                            |
| F000                                        | 840                                              |
| μ(cm <sup>-1</sup> )                        | 0.228                                            |
| Absorption corrections                      | multi-scan ; 0.9558 min, 0.9644 max              |
| Diffractometer                              | KappaCCD                                         |
| X-ray source                                | MoKα                                             |
| λ(Å)                                        | 0.71069                                          |
| Monochromator                               | graphite                                         |
| T (K)                                       | 150.0(1)                                         |
| Scan mode                                   | phi and omega scans                              |
| Maximum θ                                   | 30.01                                            |
| HKL ranges                                  | -16 16 ; -20 24 ; -17 17                         |
| Reflections measured                        | 11250                                            |
| Unique data                                 | 6684                                             |
| Rint                                        | 0.0209                                           |
| Reflections used                            | 5111                                             |
| Criterion                                   | >2sigma(I)                                       |
| Refinement type                             | Fsqd                                             |
| Hydrogen atoms                              | mixed                                            |
| Parameters refined                          | 241                                              |
| Reflections / parameter                     | 21                                               |
| wR2                                         | 0.1197                                           |
| R1                                          | 0.0410                                           |
| Weights a, b                                | 0.0620 ; 0.1790                                  |
| GoF                                         | 1.076                                            |
| difference peak / hole (e Å <sup>-3</sup> ) | 0.389(0.051) / -0.333(0.051)                     |

# Supplementary Material (ESI) for New Journal of Chemistry  
# This journal is (c) The Royal Society of Chemistry and  
# The Centre National de la Recherche Scientifique, 2007

Figure S3 : Ortep view of crystal structure of complex **2**. Ellipsoids are scaled to enclose 50% of the electron density.



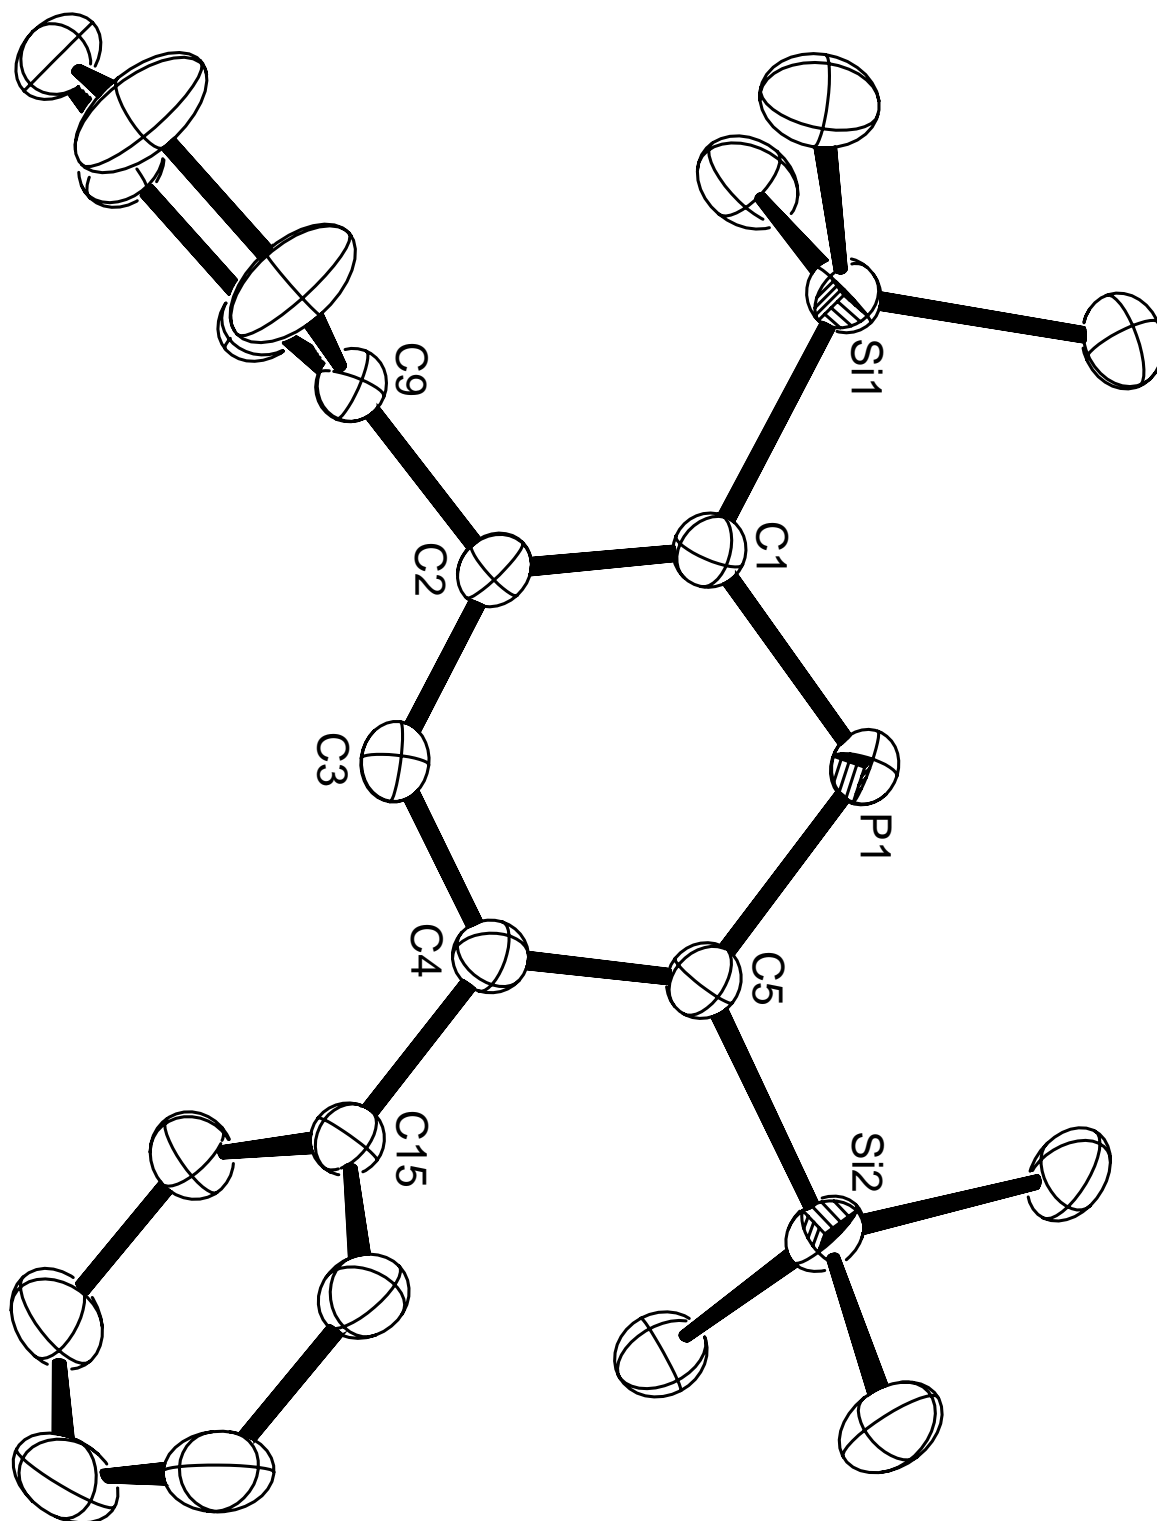

# Supplementary Material (ESI) for New Journal of Chemistry  
 # This journal is (c) The Royal Society of Chemistry and  
 # The Centre National de la Recherche Scientifique, 2007

Table 4 : Optimized geometry for **III**

| Center<br>Number | Atomic<br>Number | Atomic<br>Type | Coordinates (Angstroms) |          |           |
|------------------|------------------|----------------|-------------------------|----------|-----------|
|                  |                  |                | X                       | Y        | Z         |
| 1                | 6                | 0              | -1.370908               | 0.000000 | -0.129018 |
| 2                | 6                | 0              | -1.349460               | 0.000000 | 1.265300  |
| 3                | 6                | 0              | -0.192235               | 0.000000 | 2.045732  |
| 4                | 6                | 0              | 1.090121                | 0.000000 | 1.494544  |
| 5                | 6                | 0              | 1.370945                | 0.000000 | 0.128630  |
| 6                | 1                | 0              | -2.307304               | 0.000000 | -0.672456 |
| 7                | 1                | 0              | -2.309222               | 0.000000 | 1.773756  |
| 8                | 1                | 0              | -0.293562               | 0.000000 | 3.124038  |
| 9                | 1                | 0              | 1.938360                | 0.000000 | 2.172896  |
| 10               | 1                | 0              | 2.392186                | 0.000000 | -0.230851 |
| 11               | 15               | 0              | 0.094536                | 0.000000 | -1.006037 |
| 12               | 8                | 0              | 0.233841                | 0.000000 | -2.488495 |

Three lowest frequencies :

|                | 1        | 2        | 3        |
|----------------|----------|----------|----------|
|                | B1       | B1       | B2       |
| Frequencies -- | 185.9116 | 291.6674 | 295.6435 |
| Red. masses -- | 6.0429   | 7.1725   | 8.7766   |
| Frc consts --  | 0.1231   | 0.3595   | 0.4520   |
| IR Inten --    | 3.6711   | 5.6226   | 13.3026  |

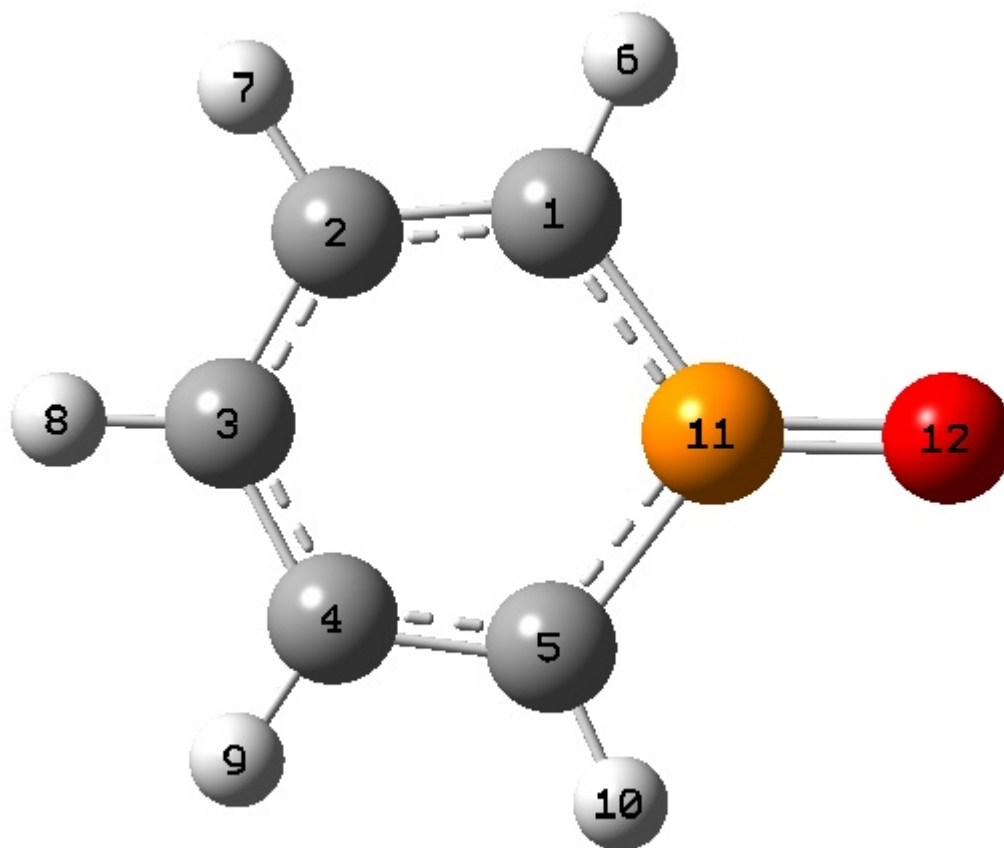

Table 5 : Optimized geometry for **IV**

| Center Number | Atomic Number | Atomic Type | Coordinates (Angstroms) |           |           |
|---------------|---------------|-------------|-------------------------|-----------|-----------|
|               |               |             | X                       | Y         | Z         |
| 1             | 6             | 0           | 0.000000                | 1.374200  | -0.424654 |
| 2             | 6             | 0           | 0.000000                | 1.226308  | -1.807905 |
| 3             | 6             | 0           | 0.000000                | 0.000000  | -2.476372 |
| 4             | 6             | 0           | 0.000000                | -1.226308 | -1.807905 |
| 5             | 6             | 0           | 0.000000                | -1.374200 | -0.424654 |
| 6             | 1             | 0           | 0.000000                | 2.356586  | 0.030485  |
| 7             | 1             | 0           | 0.000000                | 2.134119  | -2.404213 |
| 8             | 1             | 0           | 0.000000                | 0.000000  | -3.559470 |
| 9             | 1             | 0           | 0.000000                | -2.134119 | -2.404213 |
| 10            | 1             | 0           | 0.000000                | -2.356586 | 0.030485  |
| 11            | 15            | 0           | 0.000000                | 0.000000  | 0.608353  |
| 12            | 16            | 0           | 0.000000                | 0.000000  | 2.551911  |

Three lowest frequencies :

|                                            | 1        | 2        | 3           |
|--------------------------------------------|----------|----------|-------------|
|                                            | B1       | B2       | B1          |
| Frequencies --                             | 127.8485 | 198.1675 | 273.2197    |
| Red. masses --                             | 8.0781   | 8.3551   | 5.1352      |
| Frc consts --                              | 0.0778   | 0.1933   | 0.2259      |
| IR Inten --                                | 0.1915   | 1.1137   | 0.0076      |
| Sum of electronic and zero-point Energies= |          |          | -933.092690 |

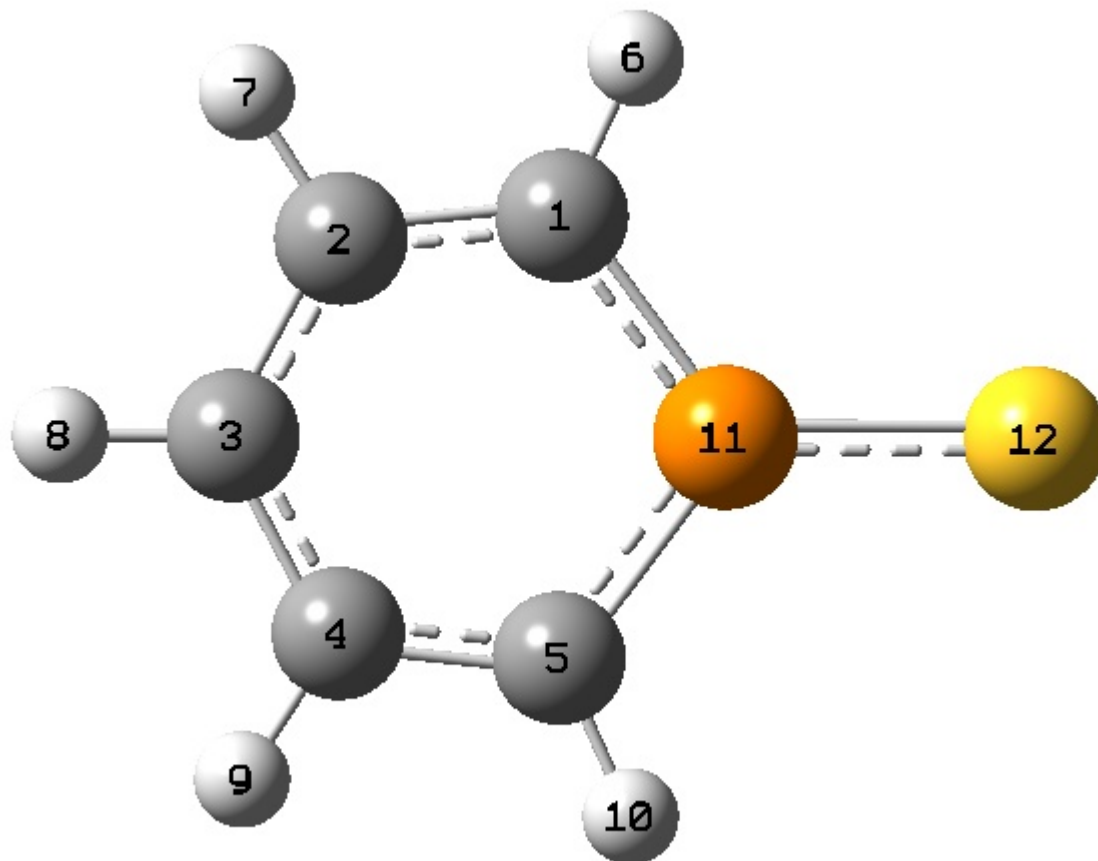

Table 6 : Optimized geometry for V

| Center<br>Number | Atomic<br>Number | Atomic<br>Type | Coordinates (Angstroms) |           |           |
|------------------|------------------|----------------|-------------------------|-----------|-----------|
|                  |                  |                | X                       | Y         | Z         |
| 1                | 15               | 0              | -.616002                | -.445755  | -.333315  |
| 2                | 6                | 0              | -.611127                | -.456462  | 1.509098  |
| 3                | 6                | 0              | .575863                 | -.490670  | 2.249153  |
| 4                | 6                | 0              | -1.839586               | -.422913  | 2.179790  |
| 5                | 6                | 0              | .533438                 | -.480095  | 3.643199  |
| 6                | 1                | 0              | 1.533631                | -.534138  | 1.745087  |
| 7                | 6                | 0              | -1.876959               | -.406712  | 3.571217  |
| 8                | 1                | 0              | -2.760335               | -.428032  | 1.607738  |
| 9                | 6                | 0              | -.691081                | -.434216  | 4.305364  |
| 10               | 1                | 0              | 1.457967                | -.513371  | 4.208684  |
| 11               | 1                | 0              | -2.832844               | -.381290  | 4.082198  |
| 12               | 1                | 0              | -.722749                | -.428151  | 5.389168  |
| 13               | 6                | 0              | 1.062858                | -1.028580 | -.819492  |
| 14               | 6                | 0              | 1.282557                | -2.406170 | -.937980  |
| 15               | 6                | 0              | 2.115829                | -.140497  | -1.065172 |
| 16               | 6                | 0              | 2.543159                | -2.886779 | -1.280947 |
| 17               | 1                | 0              | .459690                 | -3.093559 | -.778500  |
| 18               | 6                | 0              | 3.375767                | -.626338  | -1.414158 |
| 19               | 1                | 0              | 1.957393                | .928698   | -.994379  |
| 20               | 6                | 0              | 3.592056                | -1.998315 | -1.518605 |
| 21               | 1                | 0              | 2.704006                | -3.955182 | -1.370990 |
| 22               | 1                | 0              | 4.184286                | .069315   | -1.609096 |
| 23               | 1                | 0              | 4.571487                | -2.374644 | -1.792032 |
| 24               | 6                | 0              | -.657968                | 1.335802  | -.801200  |
| 25               | 6                | 0              | -1.038660               | 1.674400  | -2.105228 |
| 26               | 6                | 0              | -.317011                | 2.349549  | .100944   |
| 27               | 6                | 0              | -1.060773               | 3.007968  | -2.503770 |
| 28               | 1                | 0              | -1.333099               | .892117   | -2.795435 |
| 29               | 6                | 0              | -.346136                | 3.684764  | -.301086  |
| 30               | 1                | 0              | -.036911                | 2.104927  | 1.118291  |
| 31               | 6                | 0              | -.713733                | 4.015277  | -1.603255 |
| 32               | 1                | 0              | -1.357444               | 3.260960  | -3.515425 |
| 33               | 1                | 0              | -.086639                | 4.464244  | .406521   |
| 34               | 1                | 0              | -.737986                | 5.053817  | -1.913927 |
| 35               | 16               | 0              | -2.083211               | -1.507466 | -1.127213 |

Three lowest frequencies :

|                | 1       | 2       | 3       |
|----------------|---------|---------|---------|
|                | A       | A       | A       |
| Frequencies -- | 23.9079 | 23.9580 | 43.0691 |
| Red. masses -- | 3.8273  | 3.8265  | 3.7040  |
| Frc consts --  | .0013   | .0013   | .0040   |
| IR Inten --    | .1597   | .1620   | .0485   |

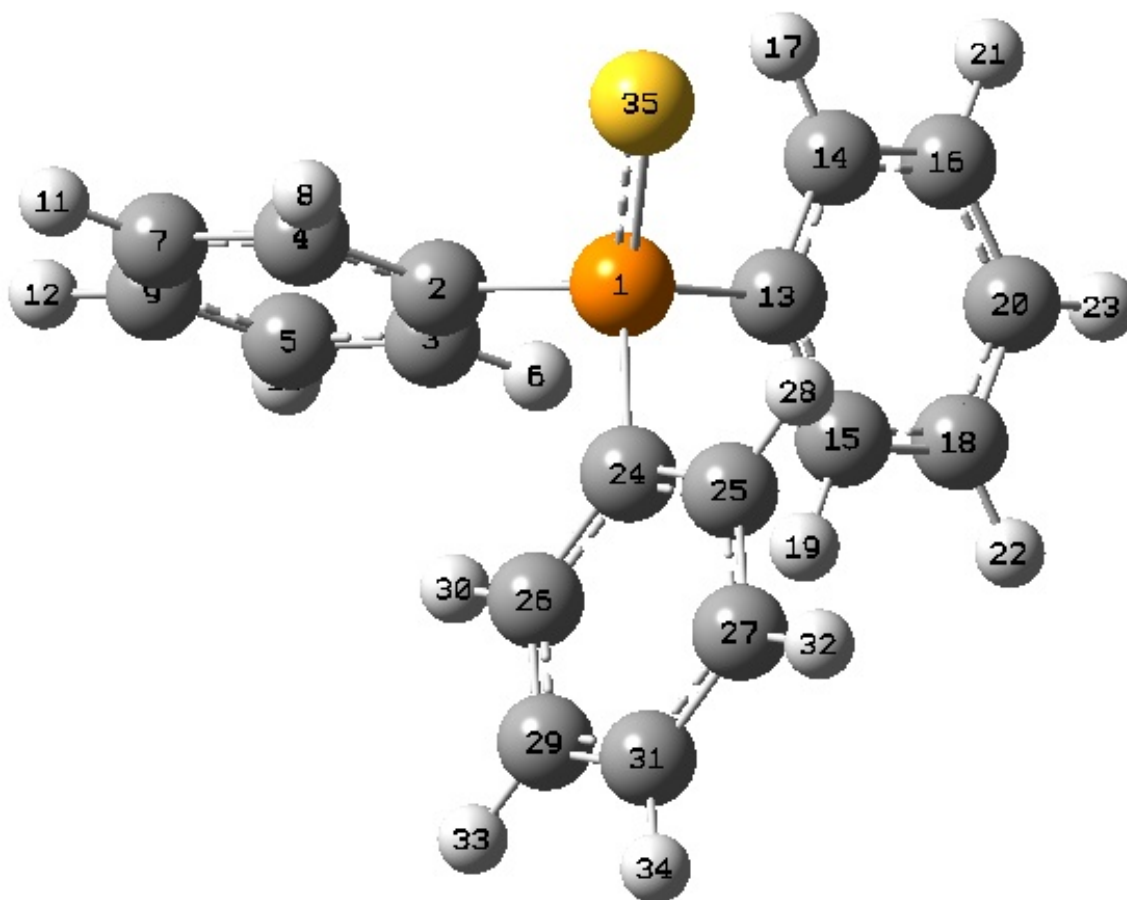

Table 7 : Optimized geometry for **barrelene sulfide**

| Center Number | Atomic Number | Atomic Type | Coordinates (Angstroms) |           |           |
|---------------|---------------|-------------|-------------------------|-----------|-----------|
|               |               |             | X                       | Y         | Z         |
| 1             | 15            | 0           | -0.625792               | 0.000086  | -0.321730 |
| 2             | 6             | 0           | -0.534020               | -0.001155 | 1.518821  |
| 3             | 6             | 0           | 0.711507                | -0.000507 | 1.981519  |
| 4             | 6             | 0           | 1.858346                | 0.000247  | 0.955080  |
| 5             | 6             | 0           | 1.696609                | 1.244955  | 0.064572  |
| 6             | 6             | 0           | 0.559404                | 1.381606  | -0.608566 |
| 7             | 1             | 0           | 0.960483                | -0.000768 | 3.037419  |
| 8             | 1             | 0           | 2.826257                | 0.000338  | 1.452465  |
| 9             | 1             | 0           | 2.511406                | 1.959771  | 0.019580  |
| 10            | 1             | 0           | 0.299974                | 2.196838  | -1.271240 |
| 11            | 1             | 0           | -1.438838               | -0.001690 | 2.112371  |
| 12            | 6             | 0           | 0.559832                | -1.381278 | -0.609040 |
| 13            | 6             | 0           | 1.697190                | -1.244309 | 0.064006  |
| 14            | 1             | 0           | 0.300604                | -2.196795 | -1.271384 |
| 15            | 1             | 0           | 2.511925                | -1.959237 | 0.019442  |
| 16            | 16            | 0           | -2.367384               | 0.000181  | -1.216940 |

Three lowest frequencies :

|                                            | 1        | 2        | 3            |
|--------------------------------------------|----------|----------|--------------|
|                                            | A        | A        | A            |
| Frequencies --                             | 177.2999 | 177.4269 | 352.3556     |
| Red. masses --                             | 7.1989   | 7.2059   | 2.7519       |
| Frc consts --                              | 0.1333   | 0.1337   | 0.2013       |
| IR Inten --                                | 1.7088   | 1.7008   | 0.3664       |
| Sum of electronic and zero-point Energies= |          |          | -1010.441280 |

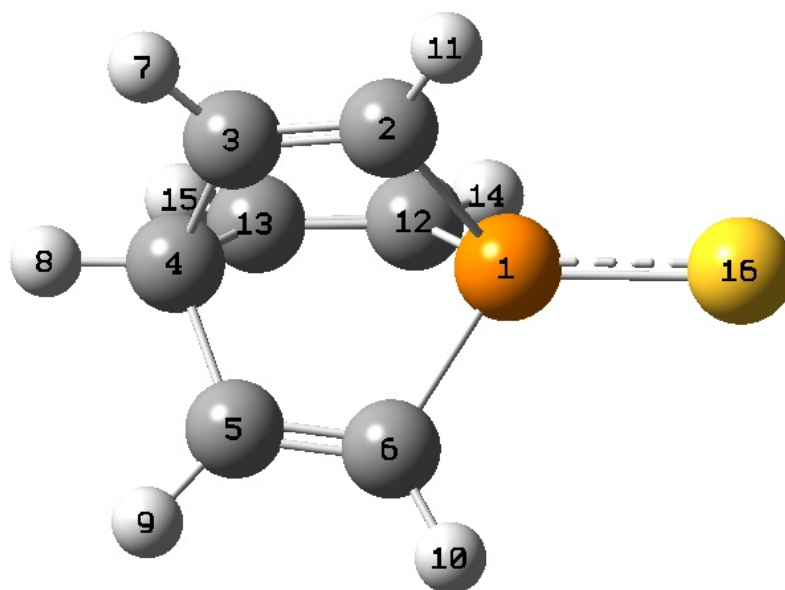

Table 8 : Optimized geometry for **Diels Alder TS**

| Center Number | Atomic Number | Atomic Type | Coordinates (Angstroms) |           |           |
|---------------|---------------|-------------|-------------------------|-----------|-----------|
|               |               |             | X                       | Y         | Z         |
| 1             | 15            | 0           | -0.738332               | -0.186754 | 0.000429  |
| 2             | 6             | 0           | 0.186054                | -0.741336 | 1.384389  |
| 3             | 6             | 0           | 1.542225                | -0.728147 | 1.247563  |
| 4             | 6             | 0           | 2.183024                | -0.452686 | 0.000984  |
| 5             | 6             | 0           | 1.545405                | 1.831361  | -0.003693 |
| 6             | 6             | 0           | 0.306986                | 1.869474  | -0.003815 |
| 7             | 1             | 0           | 2.171553                | -0.881772 | 2.119389  |
| 8             | 1             | 0           | 3.266667                | -0.414600 | 0.000912  |
| 9             | 1             | 0           | 2.558005                | 2.164051  | -0.004342 |
| 10            | 1             | 0           | -0.568132               | 2.492699  | -0.005167 |
| 11            | 1             | 0           | -0.312249               | -0.885721 | 2.334203  |
| 12            | 6             | 0           | 0.186064                | -0.747027 | -1.381231 |
| 13            | 6             | 0           | 1.542234                | -0.733264 | -1.244453 |
| 14            | 1             | 0           | -0.312222               | -0.895344 | -2.330448 |
| 15            | 1             | 0           | 2.171568                | -0.890481 | -2.115635 |
| 16            | 16            | 0           | -2.678373               | 0.019440  | -0.000003 |

Three lowest frequencies :

|                                            | 1         | 2        | 3            |
|--------------------------------------------|-----------|----------|--------------|
|                                            | A         | A        | A            |
| Frequencies --                             | -430.1769 | 137.8314 | 179.1669     |
| Red. masses --                             | 6.5064    | 7.6903   | 5.2968       |
| Frc consts --                              | 0.7094    | 0.0861   | 0.1002       |
| IR Inten --                                | 15.6731   | 0.1065   | 0.7821       |
| Raman Activ --                             | 0.0000    | 0.0000   | 0.0000       |
| Depolar --                                 | 0.0000    | 0.0000   | 0.0000       |
| Sum of electronic and zero-point Energies= |           |          | -1010.382049 |

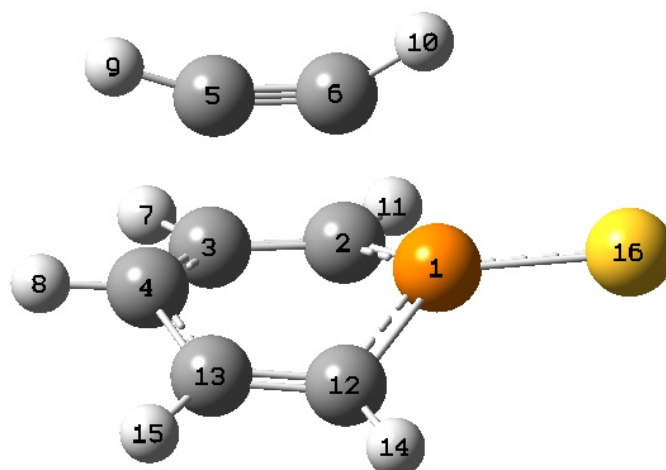



# Supplementary Material (ESI) for New Journal of Chemistry  
 # This journal is (c) The Royal Society of Chemistry and  
 # The Centre National de la Recherche Scientifique, 2007

Table 9 : Optimized geometry for **acetylene**

| Center Number | Atomic Number | Atomic Type | Coordinates (Angstroms) |          |          |
|---------------|---------------|-------------|-------------------------|----------|----------|
|               |               |             | X                       | Y        | Z        |
| 1             | 6             | 0           | -0.599682               | 0.000000 | 0.000000 |
| 2             | 1             | 0           | -1.662278               | 0.000000 | 0.000000 |
| 3             | 6             | 0           | 0.599682                | 0.000000 | 0.000000 |
| 4             | 1             | 0           | 1.662278                | 0.000000 | 0.000000 |

Three lowest frequencies :

|                                            | 1        | 2        | 3          |
|--------------------------------------------|----------|----------|------------|
|                                            | PIG      | PIG      | PIU        |
| Frequencies --                             | 653.6818 | 653.6818 | 769.9351   |
| Red. masses --                             | 1.5729   | 1.5729   | 1.0848     |
| Frc consts --                              | 0.3960   | 0.3960   | 0.3789     |
| IR Inten --                                | 0.0000   | 0.0000   | 110.9693   |
| Sum of electronic and zero-point Energies= |          |          | -77.329621 |

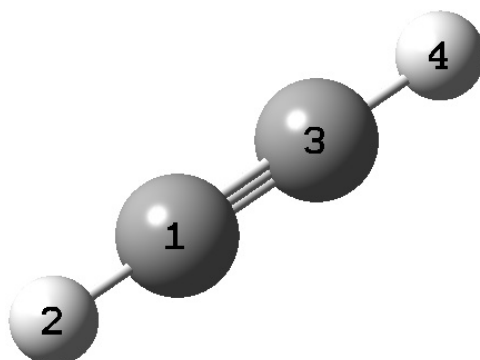

Supplement: b702851b.pdf [file b702851b.pdf]
